# Supplementary material for: A simple D–π–A hybrid mode for highly efficient non-doped true blue OLEDs with CIEy < 0.05 and EQE up to 6%
Source: Royal Society of Chemistry journal article supplement (doi:10.1039/c8tc03777a), 2018-01-01
Supplement: c8tc03777a1.pdf [file c8tc03777a1.pdf]

# **A simple D- $\pi$ -A hybrid mode for highly efficient non-doped blue OLEDs with CIE<sub>y</sub> < 0.05 and EQE up to 6%**

Jinjin Shi,<sup>a</sup> Qi Ding,<sup>a</sup> Lei Xu,<sup>a</sup> Xianhao Lv,<sup>a</sup> Zhongwei Liu,<sup>a</sup> Qikun Sun,<sup>a</sup> Yuyu Pan,<sup>b</sup>  
Shanfeng Xue\*<sup>a</sup> and Wenjun Yang\*<sup>a</sup>

<sup>a</sup>Key Laboratory of Rubber-plastics of Ministry of Education/Shandong Province (QUST), School of Polymer Science & Engineering, Qingdao University of Science & Technology, 53-Zhengzhou Road, Qingdao, 266042, P. R. China. \*E-mail: [sfxue@qust.edu.cn](mailto:sfxue@qust.edu.cn), [ywjph2004@qust.edu.cn](mailto:ywjph2004@qust.edu.cn)

<sup>b</sup>School of Petrochemical Engineering Shenyang University of Technology 30 Guanghua Street, Liaoyang, 111003, P. R. China.

## **CONTENTS**

**Experimental section and methods**

**Supporting Figures**

**Supporting Tables**

**Supporting References**

## Experimental section and methods

**Cyclic voltammetry measurements:** Cyclic voltammetry (CV) was performed using a BAS 100W (Bioanalytical Systems), using a glass carbon disk (diameter =3 mm) as the working electrode, a platinum wire with a porous ceramic wick as the auxiliary electrode, and Ag/Ag<sup>+</sup> as the reference electrode standardized by the redox couple ferrocenium/ferrocene. Anhydrous *N,N*-dimethylformamide (DMF) and dichloromethane (CH<sub>2</sub>Cl<sub>2</sub>) containing 0.1 M tetrakis(*n*-butyl)-ammonium hexafluorophosphate (NBu<sub>4</sub>PF<sub>6</sub>) as the supporting electrolyte were used as solvents under a nitrogen atmosphere. All solutions were purged with a nitrogen stream for 10 min before measurements. The procedure was performed at room temperature, and a nitrogen atmosphere was maintained over the solution during measurements. A scan rate of 50 mV s<sup>-1</sup> was applied.

**Lippert-Mataga model:** The influence of solvent environment on the optical property of our compounds can be understood using the Lippert-Mataga equation, a model that describes the interactions between the solvent and the dipole moment of solute:

$$hc(\nu_a - \nu_f) = hc(\nu_a^0 - \nu_f^0) - \frac{2(\mu_e - \mu_g)^2}{a^3} f(\epsilon, n) \quad (1)$$

where  $f$  is the orientational polarizability of solvents,  $\mu_e$  is the dipole moment of excited state,  $\mu_g$  is the dipole moment of ground state;  $a$  is the solvent cavity (Onsager) radius,  $\epsilon$  and  $n$  are the solvent dielectric and the solvent refractive index, respectively.

**X-ray crystal structure data of TPATZ:** TPATZ single crystal was successfully obtained by sublimation method. Single-crystal X-ray diffraction data were collected using a Rigaku RAXIS-PRID diffractometer with graphite monochromator Mo K $\alpha$  radiation. The structure was solved with direct methods using the SHELXTL programs and refined with full-matrix least squares on  $F^2$ . Anisotropic thermal parameters were refined for all the non-hydrogen atoms. All the hydrogen atoms of ligands were generated geometrically. CCDC 1587403 containing the crystallographic

data can be obtained free from the Cambridge Crystallographic Data Centre via [www.ccdc.cam.ac.uk/data\\_request/cif](http://www.ccdc.cam.ac.uk/data_request/cif).

***The EQE measurement method for the non-doped device:***

The measured parameters included luminance, current and EL spectrum. EQE was calculated according to the formula below:

$$EQE = \frac{\pi \cdot L \cdot e}{683 \cdot I \cdot h \cdot c} \cdot \frac{\int_{380}^{780} I(\lambda) \cdot \lambda d\lambda}{\int_{380}^{780} I(\lambda) \cdot K(\lambda) d\lambda} \quad (2)$$

where  $L$  ( $\text{cd m}^{-2}$ ) is the total luminance of device,  $I$  (A) is the current flowing into the EL device,  $\lambda$  (nm) is EL wavelength,  $I(\lambda)$  is the relative EL intensity at each wavelength and obtained by measuring the EL spectrum,  $K(\lambda)$  is the Commission International de L'Eclairage chromaticity (CIE) standard photopic efficiency function,  $e$  is the charge of an electron,  $h$  is the Planck's constant,  $c$  is the velocity of light.

***The radiative exciton ratio of the device:*** The theoretical value of the radiative excitons ratio was calculated by the following equation:

$$EQE = \gamma \times \phi_{PL} \times \eta_s \times \eta_{out} \quad (3)$$

where EQE is the external quantum efficiency;  $\gamma$  is the carrier recombination efficiency, which in the ideal case is supposed to be unity if the injected holes and electrons are fully recombined and degrade to excitons in the emissive layer,  $\phi_{PL}$  is photoluminescence efficiency of the emission layer (~49% for TPATZ film);  $\eta_s$  is the radiative exciton ratio; and  $\eta_{out}$  is the light out-coupling efficiency (20-30%).

## Supporting Figures

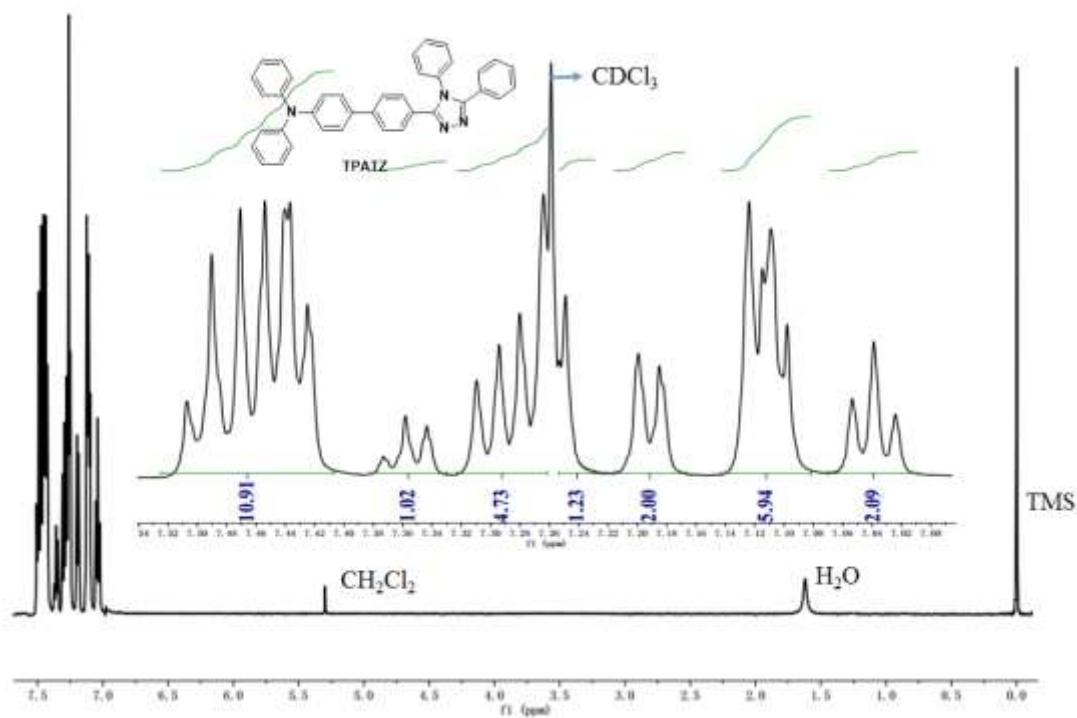

**Figure S1.** <sup>1</sup>H-NMR Spectrum of TPATZ in CDCl<sub>3</sub>.

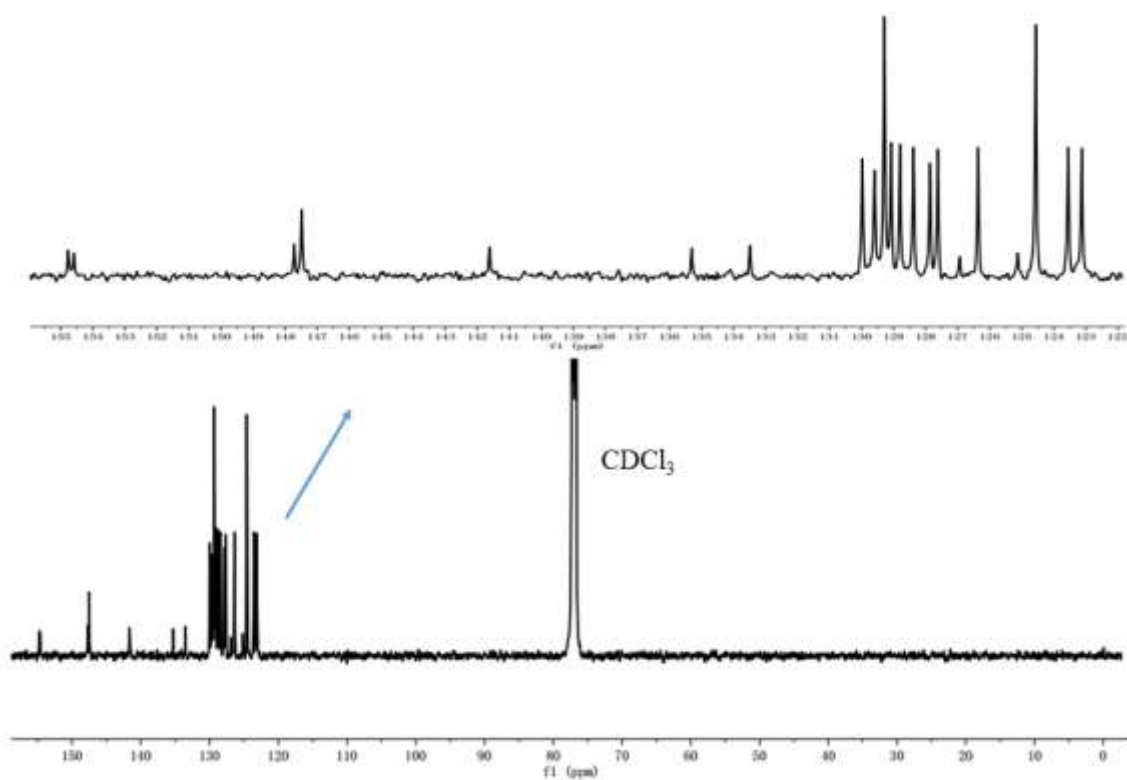

**Figure S2.** <sup>13</sup>C-NMR Spectrum of TPATZ in CDCl<sub>3</sub>.

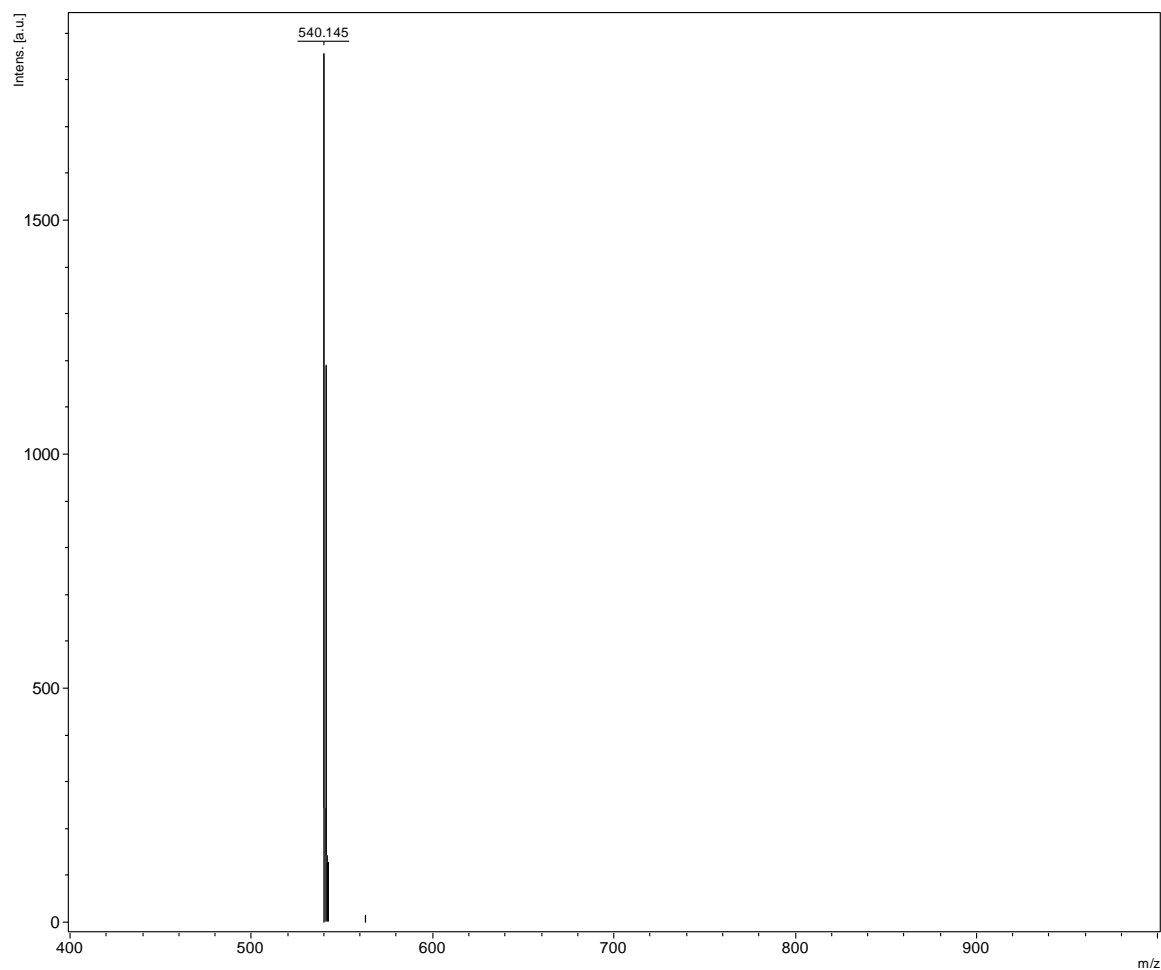

**Figure S3.** The time-of-flight mass spectrum of TPATZ.

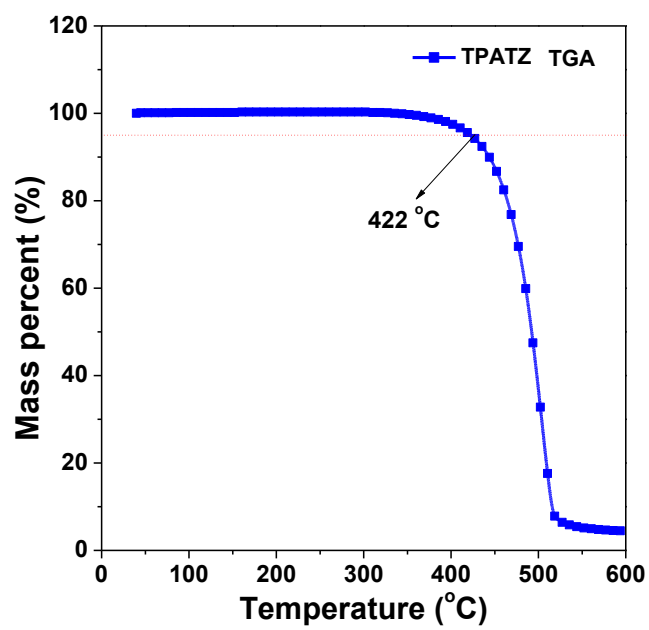

**Figure S4.** TGA curve of TPATZ.

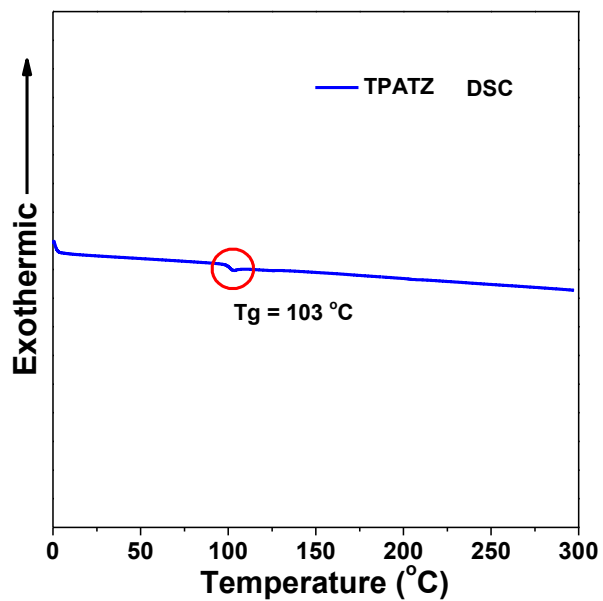

**Figure S5.** DSC curve of TPATZ.

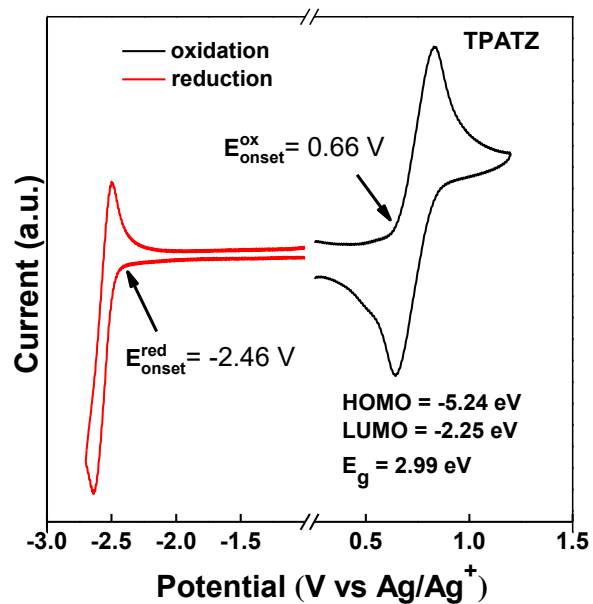

**Figure S6.** CV curve of TPATZ.

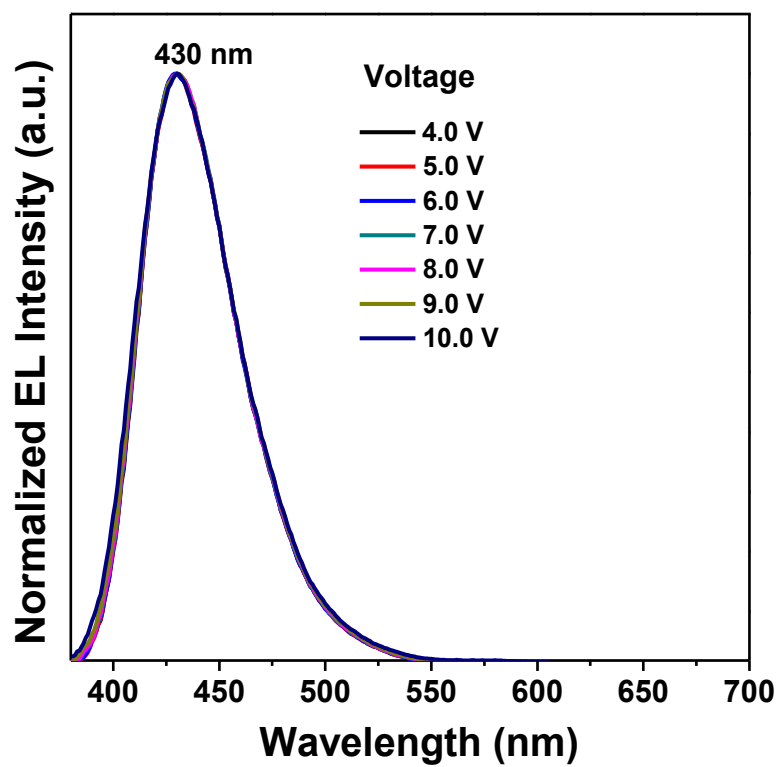

Figure S7. EL spectra at different voltages of non-doped device.

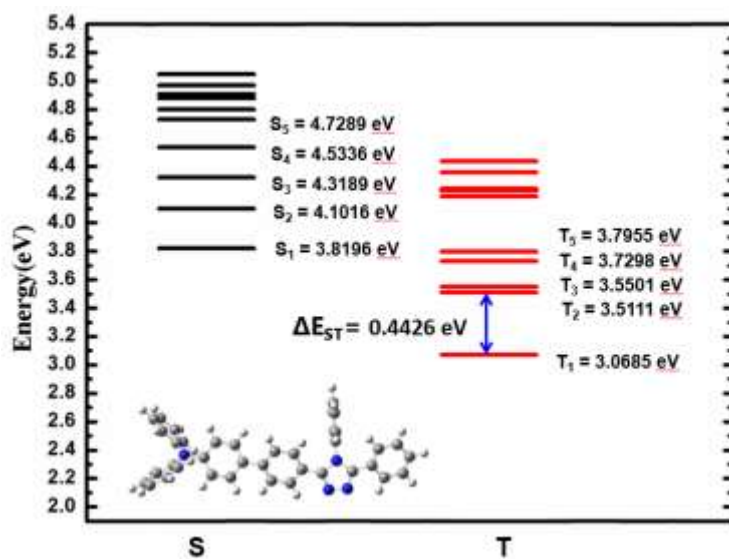

Figure S8. NTO for  $S_0 \rightarrow S_1$  transition in TPATZ.

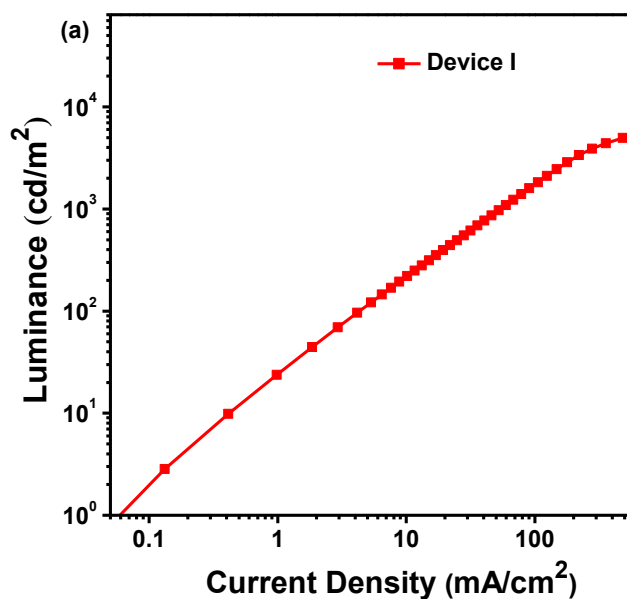

**Figure S9.** The luminescence-current density curve of the device (Device structure: ITO/HATCN (5 nm)/TAPC (50)/TPATZ (20 nm)/TPBi (55 nm)/LiF(1)/Al(100nm)).

**Table S1** Single crystal structural parameters of TPATZ.

|                                           |                                                                    |
|-------------------------------------------|--------------------------------------------------------------------|
| Compound reference                        | colorless TPATZ crystal                                            |
| Chemical formula                          | C <sub>38</sub> H <sub>28</sub> N <sub>4</sub>                     |
| Formula weight                            | 540.64                                                             |
| Crystal system                            | Triclinic                                                          |
| $a/\text{Å}$                              | 9.632(7)                                                           |
| $b/\text{Å}$                              | 16.037(12)                                                         |
| $c/\text{Å}$                              | 19.704(15)                                                         |
| $\alpha/^\circ$                           | 96.198(13)                                                         |
| $\beta/^\circ$                            | 96.827(14)                                                         |
| $\gamma/^\circ$                           | 107.054(13)                                                        |
| Unit cell volume/ $\text{Å}^3$            | 2856(4)                                                            |
| Temperature/K                             | 296(2)                                                             |
| Space group                               | P-1                                                                |
| Z                                         | 4                                                                  |
| Density (calculated) / $\text{g cm}^{-3}$ | 1.257                                                              |
| F(000)                                    | 1136                                                               |
| Theta range for data collection           | 1.05 to 25.00 deg.                                                 |
| Index ranges                              | $-10 \leq h \leq 11$ , $-18 \leq k \leq 19$ , $-22 \leq l \leq 23$ |
| Reflections measured                      | 14546                                                              |
| Independent reflections                   | 9947                                                               |



|                                                                               |                                                    |
|-------------------------------------------------------------------------------|----------------------------------------------------|
| <i>R</i> <sub>int</sub>                                                       | 0.0354                                             |
| Completeness to theta = 72.13°                                                | 98.8 %                                             |
| Absorption correction                                                         | Semi-empirical from equivalents                    |
| Max. and min. transmission                                                    | 0.9823 and 0.9758                                  |
| Refinement method                                                             | Full-matrix least-squares on <i>F</i> <sup>2</sup> |
| Data / restraints / parameters                                                | 9947 / 0 / 746                                     |
| Goodness-of-fit on <i>F</i> <sup>2</sup>                                      | 1.089                                              |
| Final <i>R</i> <sub><i>I</i></sub> values ( <i>I</i> > 2σ( <i>I</i> ))        | 0.0559                                             |
| Final <i>wR</i> ( <i>F</i> <sup>2</sup> ) values ( <i>I</i> > 2σ( <i>I</i> )) | 0.1228                                             |
| Final <i>R</i> <sub><i>I</i></sub> values (all data)                          | 0.1000                                             |
| Final <i>wR</i> ( <i>F</i> <sup>2</sup> ) values (all data)                   | 0.1363                                             |
| CCDC number                                                                   | 1587403                                            |

**Table S2.** The PL efficiency ( $\Phi_{\text{PL}}$ ) of TPATZ in different solvents.

| solvent                | n-hexane | isopropyl ether | diethyl ether | tetrahydrofuran | acetonitrile |
|------------------------|----------|-----------------|---------------|-----------------|--------------|
| $\Phi_{\text{PL}}$ (%) | 60       | 77              | 86            | 92              | 86           |

**Table S3.** Recent representative non-doped true-blue OLEDs with  $\text{CIE}_y \leq 0.05$  based on organic fluorescent small molecules.

| Materials                                                                                     | $V_{\text{on}}$ <sup>[a]</sup><br>[V] | $\text{CE}_{\text{max}}$ <sup>[b]</sup><br>[cd A <sup>-1</sup> ] | $\text{EQE}_{\text{max}}$ <sup>[c]</sup><br>[%] | $\text{PE}_{\text{max}}$ <sup>[d]</sup><br>[lm W <sup>-1</sup> ] | $\lambda_{\text{EL}}$ <sup>[e]</sup><br>[nm] | CIE<br>[x, y]   | ref          |
|-----------------------------------------------------------------------------------------------|---------------------------------------|------------------------------------------------------------------|-------------------------------------------------|------------------------------------------------------------------|----------------------------------------------|-----------------|--------------|
| 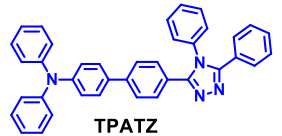<br>TPATZ  | 3.1                                   | 2.41                                                             | 5.92                                            | 2.20                                                             | 430                                          | 0.155,<br>0.047 | This<br>work |
| <br>TPAXAN | 3.4                                   | –                                                                | 4.62                                            | –                                                                | 428                                          | 0.155,<br>0.049 | 1            |

|                                                                                                         |     |      |      |      |     |                 |   |
|---------------------------------------------------------------------------------------------------------|-----|------|------|------|-----|-----------------|---|
| 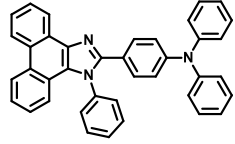 <p><b>BPA-BPI</b></p> | 2.0 | 0.65 | 1.37 | 0.68 | 428 | 0.15, 0.05      | 2 |
|  <p><b>CPhBzIm</b></p> | 2.5 | 1.6  | 3    | 1.07 | 426 | 0.16, 0.05      | 3 |
|  <p><b>TTP-TPI</b></p> | 3.1 | 2.10 | 5.02 | 1.88 | 424 | 0.16, 0.05      | 4 |
|  <p><b>TDAF-1</b></p>  | 2.5 | 1.53 | 5.3  | –    | –   | 0.158,<br>0.041 | 5 |
|  <p><b>TDAF-2</b></p> | 2.5 | 1.1  | 4.1  | –    | –   | 0.160,<br>0.044 | 5 |
|  <p><b>M1</b></p>    | –   | 0.65 | 1.94 | 0.48 | 420 | 0.165,<br>0.050 | 6 |

<sup>a)</sup>Turn on voltage at a luminance of 1 cd m<sup>-2</sup>; <sup>b)</sup>Maximal current efficiency; <sup>c)</sup>Maximal external quantum efficiency; <sup>d)</sup>Maximal power efficiency; <sup>e)</sup>Maximal EL peak value ( $\lambda_{EL}$ ); e)Non-doped device.

### Reference:

[1] R. Kim, S. H. Lee, K-H. Kim, Y-J. Lee, S-K. Kwon, J-J. Kim, Y-H. Kim, *Chem. Comm.* **2013**, 49, 4664.

[2] Y. Zhang, S-L. Lai, Q-X. Tong, M-F. Lo, T-W. Ng, M-Y. Chan, Z-C. Wen, J. He, K-S. Jeff, X-L. Tang, W-M. Liu, C-C. Ko, P-F. Wang and C-S. Lee, *Chem. Mater.* **2012**, 24, 61.

[3] W-Y. Hung, L-C. Chi, W-J. Chen, Y-M. Chen, S-H. Chou and K-T. Wong, *J. Mater. Chem.* **2010**, 20, 10113.

[4] Y. Yuan, J-X. Chen, F. Lu, Q-X. Tong, Q-D. Yang, H-W. Mo, T-W. Ng, F-L. Wong, Z-Q. Guo, J. Ye, Z. Chen, X-H. Zhang and C-S. Lee, *Chem. Mater.* **2013**, *25*, 4957.

[5] C-C. Wu, Y-T. Lin, K-T. Wong, R-T. Chen and Y-Y. Chien, *Adv. Mater.* **2004**, *16*, 61.

[6] Z. Gao, Y. I. Liu, Z. M. Wang, F. Z. Shen, H. Liu, G. N. Sun, L. Yao, Y. Lv, P. Lu and Y. G. Ma, *Chem. Eur. J.* **2013**, *19*, 2602.
